# Supplementary material for: A novel motif of Rad51 serves as an interaction hub for recombination auxiliary factors
Source: eLife. 2021 Jan 25;10:e64131. doi: 10.7554/eLife.64131 (PMC7837696; doi:10.7554/eLife.64131)
Supplement: Figure 2—source data 1. [file elife-64131-fig2-data1.xlsx]

## Sheet: Fig2A
		Percentage survival
	UV J/m2	wild type			E206A			rad51∆
	0	100	100	100	100	100	100	100	100	100
	50	55.7143	76.087	42.6667	50	49.5495	25.4545	14.0909	12.6415	8.75
	75	36.4286	41.3043	31.3333	34.0909	27.9279	33.6364	0.227273	0.169811	0.2
	100	26.8571	41.7391	47.4667	28.1818	10.8108	14.5455	0.0469697	0.0113208	0.0125
	200	2.09524	4.63768	19.5556	5.45455	1.32132	7.0303

## Sheet: Fig2B
		Percentage survival
	UV J/m2	rad57∆			rad57∆ E206A			rad57∆ rad51∆
	0	100	100	100	100	100	100	100	100	100
	50	23.3766	30.8642	45.3804	35.4701	49.4792	38.4832	10.1579	11.4094	13.3684
	75	29.8701	18.6728	17.9348	22.0085	53.125	22.191	0.227368	0.641611	0.385965
	100	9.48052	13.0556	12.2283	16.2393	46.25	14.7472	0.0478947	0.025503	0.028421

## Sheet: Fig2C
		Percentage survival
	UV J/m2	sfr1∆			sfr1∆ E206A			sfr1∆ rad51∆
	0	100	100	100	100	100	100	100	100	100
	50	40.407	10.177	33.6957	0.282486	10.4545	5.46763	5.3	7.01571	13.0894
	75	24.1279	23.0088	27.1739	0.535593	0.918182	0.638849	1.064	0.617801	1.69106
	100	3.57558	6.81416	13.3696	0.0813559	0.094318	0.048201	0.198	0.039791	0.073171
	180	0.552326	1.50442	2.56522
