# Supplementary material for: A novel motif of Rad51 serves as an interaction hub for recombination auxiliary factors
Source: eLife. 2021 Jan 25;10:e64131. doi: 10.7554/eLife.64131 (PMC7837696; doi:10.7554/eLife.64131)
Supplement: Figure 3—source data 1. [file elife-64131-fig3-data1.xlsx]

## Sheet: Fig3C
		ATPase kcat (min-1)
		without Swi5-Sfr1			with Swi5-Sfr1
	WT	0.23668	0.2104	0.17096	0.45668	0.37678	0.35616
	E206A	0.25362	0.2005	0.20418	0.47192	0.39438	0.40172

## Sheet: Fig3E
	timepoint (min)	wild type			E206A
	0	0.517045	1.68431	1.48834	1.3202	2.09494	1.48834
	30	20.9374	31.4412	36.5729	29.0173	29.977	36.5758
	60	23.676	36.5003	39.22	32.9967	32.4903	39.22
	120	22.105	37.6776	40.1758	35.9023	35.7029	40.1737

## Sheet: Fig3F
		with Swi5-Sfr1
		% JM			% NC
	wild type	39.447	31.4864	36.199	19.0181	13.684	16.5588
	E206A	41.9078	31.2768	36.1312	15.6659	12.7394	14.0046
