# Supplementary material for: A novel motif of Rad51 serves as an interaction hub for recombination auxiliary factors
Source: eLife. 2021 Jan 25;10:e64131. doi: 10.7554/eLife.64131 (PMC7837696; doi:10.7554/eLife.64131)
Supplement: Figure 4—source data 1. [file elife-64131-fig4-data1.xlsx]

## Sheet: Fig4B
		Rad51 coIP relative to V5 IP
	WT	1	1
	EE	0.576455	0.581039
	D209A	0.291121	0.478673
	EED	0.274087	0.331629
