# Supplementary material for: A novel motif of Rad51 serves as an interaction hub for recombination auxiliary factors
Source: eLife. 2021 Jan 25;10:e64131. doi: 10.7554/eLife.64131 (PMC7837696; doi:10.7554/eLife.64131)
Supplement: Figure 5—figure supplement 1—source data 1. [file elife-64131-fig5-figsupp1-data1.xlsx]

## Sheet: Fig5_S1
	Number of Rad51 foci per nucleus (without UV treatment)
Nucleus #	wild type	rad51∆	sfr1∆	rad57∆	sfr1∆ rad57∆	rad52∆	rad54∆	rad51-EED
1	3	0	0	0	0	0	0	0
2	0	0	0	0	0	0	2	0
3	0	0	0	1	0	0	0	0
4	0	1	0	1	0	1	0	0
5	1	0	0	0	0	0	0	0
6	0	1	0	0	0	0	0	0
7	0	0	0	0	0	0	0	0
8	1	0	0	4	0	0	0	0
9	6	0	0	3	0	0	0	0
10	0	0	0	2	0	0	5	0
11	0	0	0	1	0	0	0	0
12	0	0	0	1	0	0	3	0
13	0	0	0	0	0	0	0	0
14	0	1	0	0	0	0	0	0
15	2	1	0	1	0	0	0	0
16	0	1	0	1	0	0	0	0
17	0	0	0	0	0	0	1	0
18	0	2	0	1	0	0	0	0
19	0	0	0	0	0	0	0	0
20	0	0	0	0	0	0	0	0
21	0	1	0	0	0	0	0	0
22	0	1	0	1	0	0	0	0
23	0	2	1	1	0	0	0	0
24	0	1	0	2	0	0	1	0
25	0	0	0	0	0	0	0	0
26	0	0	0	0	0	0	0	0
27	0	0	0	0	0	0	0	0
28	0	0	0	0	0	0	0	0
29	0	0	3	0	0	0	4	0
30	0	1	3	0	0	0	0	0
31	0	0	0	1	0	0	0	0
32	0	0	1	0	0	0	1	0
33	0	0	0	0	0	0	0	0
34	0	0	0	1	0	0	0	0
35	0	0	0	0	0	0	2	0
36	5	1	0	0	2	0	0	0
37	0	1	2	0	0	0	0	0
38	0	1	1	0	0	0	1	0
39	0	1	0	0	0	0	0	0
40	0	0	0	1	0	0	0	0
41	0	0	0	0	0	0	0	0
42	0	0	0	0	0	0	1	0
43	0	0	1	0	0	0	0	0
44	0	0	1	0	2	0	0	0
45	0	0	1	0	0	0		0
46	0	0	0	0	0	0		0
47	0	0	0	0	0	0		0
48	0	0	1	0	0	0		0
49		0	2	0	0	0		0
50		0	1	0	11			0
51		0	1	0	0			0
52		0	2	0	0			0
53		1	1	1	0			0
54			1	1	0			0
55			1	0	0			0
56			1	0
57			3	0
58			0	0
59			0	4
60			2	1
61			0	3
62			0	0
63			0	0
64			1
65			0
66			0
67			0
68			0
69			0
70			0
71			0
72			0
73			0
74			0
