# Supplementary material for: A novel motif of Rad51 serves as an interaction hub for recombination auxiliary factors
Source: eLife. 2021 Jan 25;10:e64131. doi: 10.7554/eLife.64131 (PMC7837696; doi:10.7554/eLife.64131)
Supplement: Figure 5—source data 1. [file elife-64131-fig5-data1.xlsx]

## Sheet: Fig5C
	Number of Rad51 foci per nucleus (with UV treatment)
Nucleus #	wild type	rad51∆	sfr1∆	rad57∆	sfr1∆ rad57∆	rad52∆	rad54∆	rad51-EED
1	8	0	0	0	0	0	5	2
2	1	0	0	8	0	5	0	0
3	13	1	2	0	0	11	5	4
4	10	0	0	0	0	4	6	0
5	9	0	0	1	1	2	19	12
6	13	0	14	3	0	1	2	4
7	9	0	1	0	4	0	11	0
8	10	0	0	2	5	1	16	0
9	10	0	5	2	0	1	11	0
10	7	0	0	8	0	0	8	5
11	0	0	2	3	0	0	3	1
12	0	0	0	2	13	4	1	8
13	9	0	4	0	2	10	6	0
14	15	0	3	1	0	0	4	0
15	2	0	1	2	0	1	11	2
16	14	0	11	0	3	0	8	8
17	11	0	3	16	15	8	11	12
18	9	0	0	1	0	4	0	0
19	2	0	0	3	3	1	7	0
20	1	0	0	6	1	0	3	5
21	8	0	0	0	0	0	0	1
22	10	0	0	0	0	0	3	0
23	7	0	5	0	0	0	6	0
24	4	0	22	1	0	1	8	0
25	3	0	5	3	0	0	5	0
26	7	0	4	1	0	1	5	4
27	5	0	0	20	0	0	3	0
28	16	0	12	1	0	0	0	0
29	7	0	0	0	0	3	13	4
30	3	0	0	2	0	2	8	0
31	10	0	0	0	2	5	10	1
32	8	0	0	5	1	0	5	0
33	13	0	0	1	0	1	6	0
34	15	0	7	2	0	1	12	0
35	5	0	0	4	3	2	7	1
36	1	0	0	0	0	0	8	0
37	6	0	0	4	16	0	0	3
38	4	0	11	6	0	0	0	0
39	12	0	0	3	1	0	7	1
40	26	0	0	2	0	0	10	2
41	33	0	2	0	0	0	8	0
42	0	0	4	12	0	0	11	0
43	8	0	8	2	0	3	3	0
44	6	0	0	0	0	2	11	0
45	20	0	0	2	0	2	16	1
46	5	0	0	6	0	2	1	0
47	6	0	13	2	1	1	14	0
48	5	0	1	4	0	1		0
49	13	0	0	1	0			0
50	7	0	0	8	0
51	0	0	0	0	0
52	0			5	0
53	20			0	16
54	16			1	1
55	0			3
56	10			0
57	12			1
58	8
59	15
