# Supplementary material for: A novel motif of Rad51 serves as an interaction hub for recombination auxiliary factors
Source: eLife. 2021 Jan 25;10:e64131. doi: 10.7554/eLife.64131 (PMC7837696; doi:10.7554/eLife.64131)
Supplement: Figure 6—figure supplement 1—source data 1. [file elife-64131-fig6-figsupp1-data1.xlsx]

## Sheet: Fig6_S1D
		Rad51 coIP relative to Sfr1 IP
	WT	1	1
	E206K	0.90173	0.635453
