# Supplementary material for: A novel motif of Rad51 serves as an interaction hub for recombination auxiliary factors
Source: eLife. 2021 Jan 25;10:e64131. doi: 10.7554/eLife.64131 (PMC7837696; doi:10.7554/eLife.64131)
Supplement: Figure 6—source data 1. [file elife-64131-fig6-data1.xlsx]

## Sheet: Fig6B
		Yield (percentage JM + PD)
	timepoint (min)	wild type			E206A			EED
	0	1.17658	0.334834	0.697257	1.97589	0.332958	0.774385	1.92989	0.586271	1.07834
	15	5.8966	5.69937	5.34186	7.17914	6.68829	6.44378	11.4725	11.0168	10.4311
	30	8.35446	9.57198	8.49422	10.3336	9.26515	9.32268	15.8784	16.2105	15.1485
	60	10.5444	13.6095	10.2869	13.0572	11.7955	11.3513	18.629	20.3213	16.7686
	120	11.435	15.2232	12.6044	14.7824	15.144	15.1657	20.5347	23.4659	21.7748

## Sheet: Fig6C
		Rad51 coIP relative to Sfr1 IP
	WT	1	1
	E206A	1.08186	1.42144
	EED	0.629326	0.553736

## Sheet: Fig6D
	Rad51	Swi5-Sfr1 (µM)	% JM			% NC
	Wild type	0	0.0454745	0.0360645	0	0.112787	0	0
		0.1	0	0	0	0.198069	0	0.204274
		0.25	9.46673	0	8.42209	5.35216	0	1.79949
		0.5	27.4249	26.8844	19.4842	15.2395	7.28271	8.89863
		2	25.5758	26.0658	17.7536	6.49175	5.60324	6.15353
	E206A	0	0	0	0	0.120365	0.0894208	0
		0.1	0.0785091	0	0	0	0.0828978	0
		0.25	6.74848	0	10.5268	3.70763	0.20329	4.7476
		0.5	28.2898	26.2712	21.4771	16.0907	12.0723	12.2907
		2	18.0527	14.418	9.83348	2.26616	1.12993	1.29499
	EED	0	1.59325	0	0.191416	1.20795	0	0.320341
		0.1	2.93797	0	0	0.505845	0.14593	0.191919
		0.25	14.7913	0	9.06261	9.06398	0	6.11141
		0.5	25.5266	26.6951	20.1798	17.9224	16.5507	18.3695
		2	22.8208	23.3389	16.7895	9.95783	9.2265	6.97764
