# Supplementary material for: A novel motif of Rad51 serves as an interaction hub for recombination auxiliary factors
Source: eLife. 2021 Jan 25;10:e64131. doi: 10.7554/eLife.64131 (PMC7837696; doi:10.7554/eLife.64131)
Supplement: Figure 7—source data 1. [file elife-64131-fig7-data1.xlsx]

## Sheet: Fig7B
		Rad52 coIP relative to Rad51 IP
	WT	1	1
	E206A	0.774943	0.879449
	EED	0.176832	0.155986

## Sheet: Fig7C
		Rad51 coIP relative to Rad54 IP
	WT	1	1	1
	E206A	0.959583	0.855176	0.958492
	EED	0.442411	0.309335	0.391972

## Sheet: Fig7D
	Rad51	Rad54 (µM)	% JM			% PD
	Wild type	0	0.634896	0.28649	0.130948	0.657773	1.18445	0.983359
		0.18	11.0949	9.45092	7.26093	7.7572	14.9654	13.0298
		0.35	21.0901	16.818	16.2943	5.70958	9.51334	7.59945
		0.7	19.2426	17.7525	14.3664	3.5634	4.72375	3.58607
		1.4	10.6947	13.1303	9.45421	1.91479	2.34187	1.30036
	E206A	0	0.794174	0.0824499	0.0437157	1.14829	1.03253	0.86357
		0.18	6.88633	4.47072	3.12767	7.75853	9.43466	7.00659
		0.35	15.9803	13.3463	8.67526	6.46873	10.9755	6.03108
		0.7	18.11	17.1558	10.487	3.39543	5.03028	2.82046
		1.4	13.8337	12.2371	7.06386	2.33621	2.4743	1.50983
	EED	0	2.76776	1.90657	0.861143	6.833	8.38275	4.81237
		0.18	2.99884	2.02509	1.27944	6.94011	8.64459	4.90991
		0.35	8.36892	3.91027	2.33342	8.69321	9.12233	5.45925
		0.7	17.6816	13.9423	9.52662	9.05338	10.029	6.19395
		1.4	21.386	22.9483	16.5968	5.04272	6.99455	4.19829
